# Supplementary material for: Insight from Biology Program Learning Outcomes: Implications for Teaching, Learning, and Assessment
Source: Atypon-hosted journal article supplement (doi:10.1187/cbe.22-09-0177), 2023-01-13
Supplement: combinedsupmats.pdf [file combinedsupmats.pdf]

# Supplemental Material

*CBE—Life Sciences Education*

Clark and Hsu

**Supporting information for Clark and Hsu, “Insight from biology program learning outcomes: Implications for teaching, learning, and assessment”**

**Supplemental table 1.** Sample program learning objectives classified by their cognitive level.

| <b>Program learning objective</b>                                                                                                      | <b>Classification as higher-order cognitive (HOC) or lower-order cognitive (LOC) skill</b> |
|----------------------------------------------------------------------------------------------------------------------------------------|--------------------------------------------------------------------------------------------|
| Identify, retrieve, and properly interpret and apply published and electronic sources of biological and other scientific information.  | HOC                                                                                        |
| Be able to analyze and answer biologically relevant problems through the successful application of quantitative and analytical methods | HOC                                                                                        |
| Critically read the scientific literature in order to evaluate the scientific process.                                                 | HOC                                                                                        |
| Explain the importance of unifying concepts in biology, including cell theory, genetics, and evolution.                                | LOC                                                                                        |
| Recognize and understand ethical principles of fundamental and applied science and practice in society.                                | LOC                                                                                        |
| Graduates will demonstrate a level of biological content knowledge appropriate to their degree level.                                  | LOC                                                                                        |
